# Supplementary material for: CRISPR–Cas9 screens reveal regulators of ageing in neural stem cells
Source: Springer Nature journal article supplement (doi:10.1038/s41586-024-07972-2), 2024-10-02
Supplement: 41586_2024_7972_MOESM1_ESM.pdf [file 41586_2024_7972_MOESM1_ESM.pdf]

**Supplementary information**

---

**CRISPR–Cas9 screens reveal regulators of ageing in neural stem cells**

---

In the format provided by the authors and unedited

**a** From Figure 1c: Genome-wide screen sorting gates

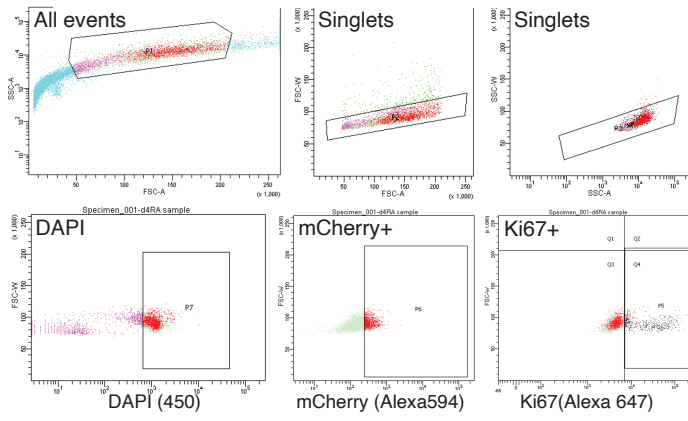

**b** From Figure 1j: Sub-screen sorting gates

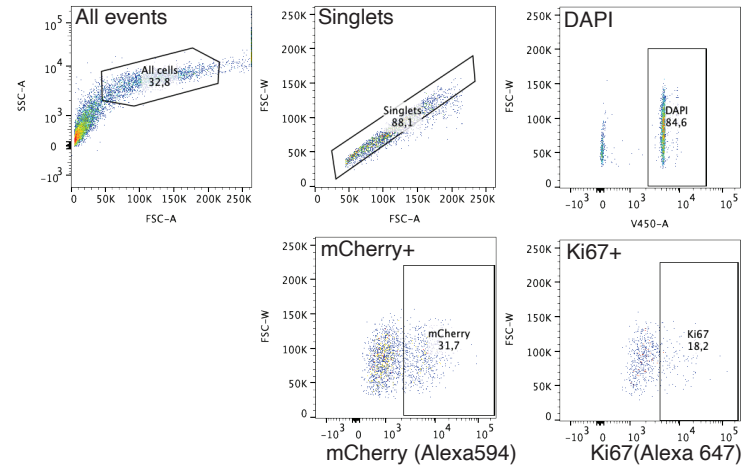

**c** From Extended Data Figure 6f: Glucose uptake assessment by FACS

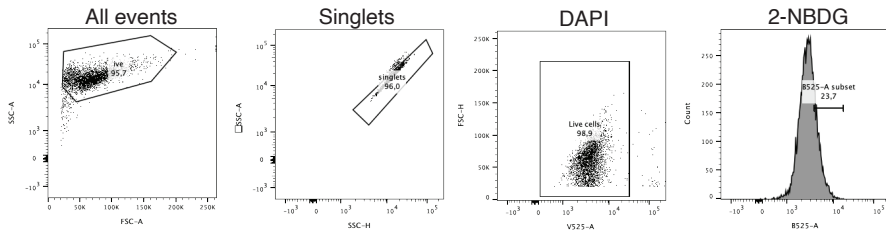

**d** From Extended Data Figure 6l: GLUT4 protein assessment by FACS

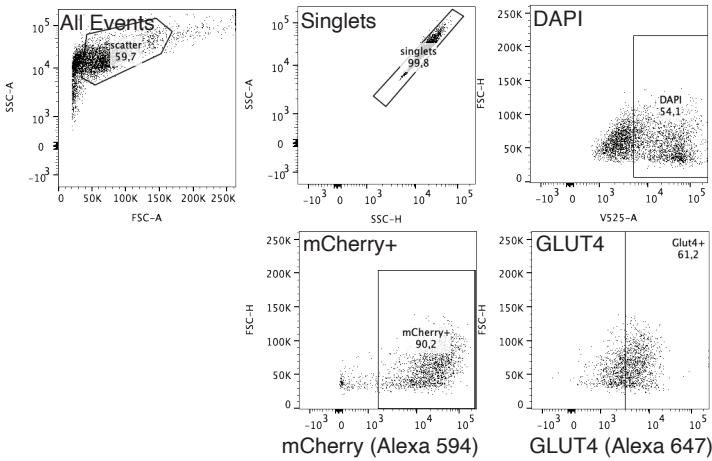

**e** From Extended Data Figure 6j: Western blot of *Slc2a4* (GLUT4) knockout in qNSCs

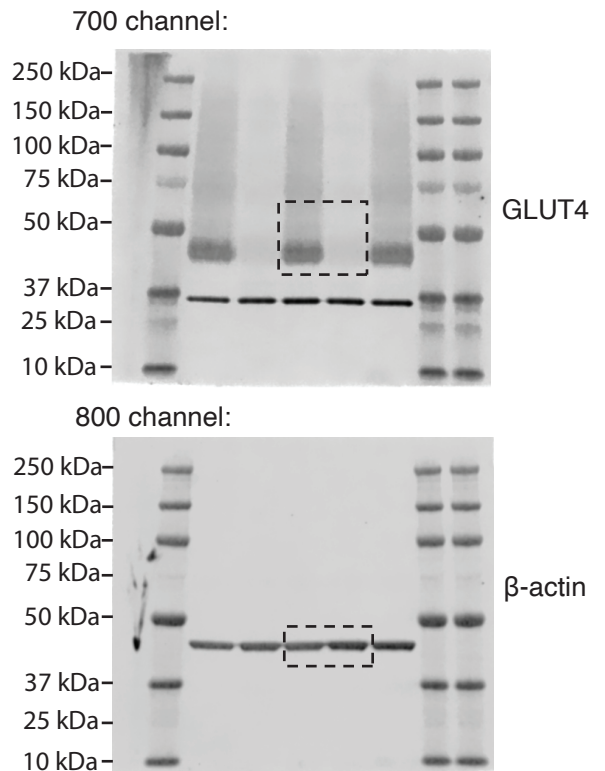

Supplementary Fig. 1. FACS gates and uncropped western blots
